# Supplementary material for: Construction of 2-D lanthanide coordination frameworks: syntheses, structures and luminescent property
Source: Royal Society of Chemistry journal article supplement (doi:10.1039/b702106b), 2007-01-01
Supplement: b702106b.pdf [file b702106b.pdf]

## Supporting Information

### Construction of 2-D Lanthanide Coordination Frameworks:

### Syntheses, Structures and Luminescent Property

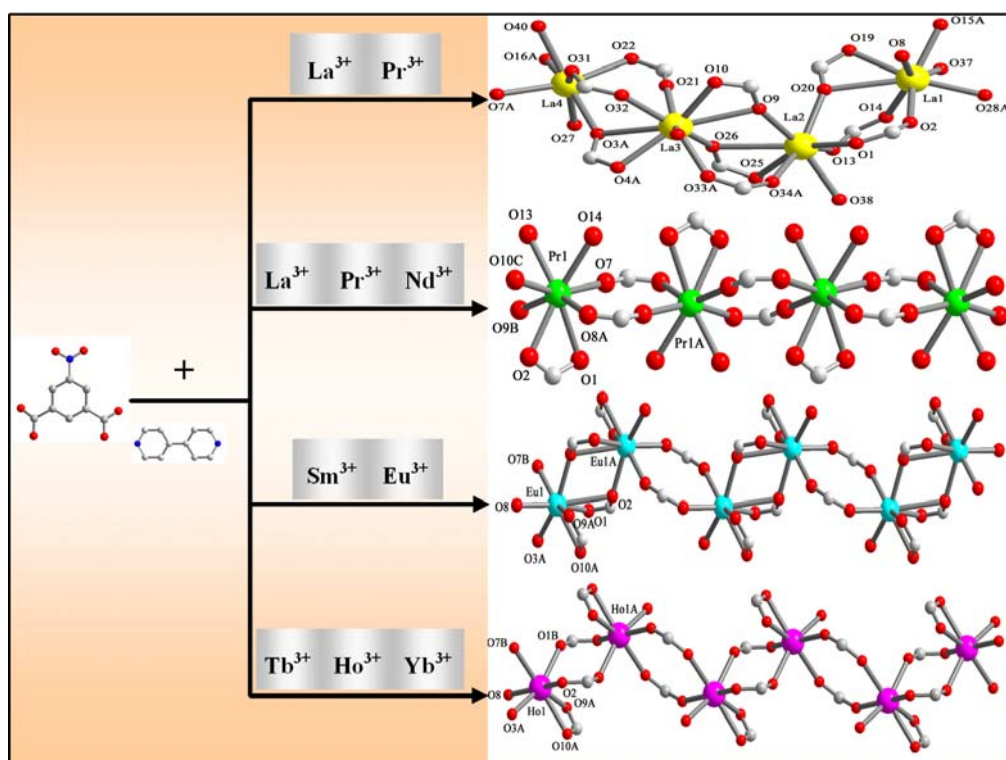

**Scheme S1.** The building units in coordination polymers of **1-10**.

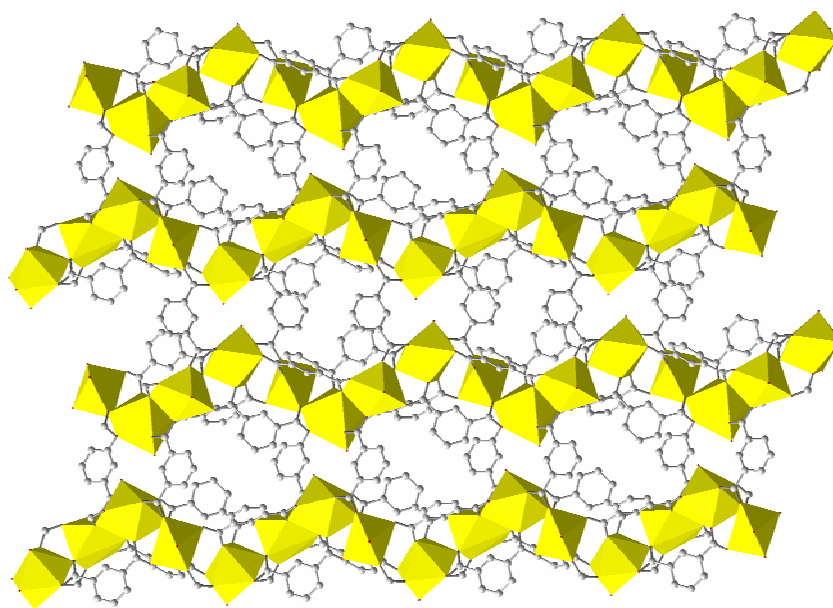

**Fig. S1.** View of a two-dimensional layer structure in **1**. The nitro groups of ligands are omitted for clarity.

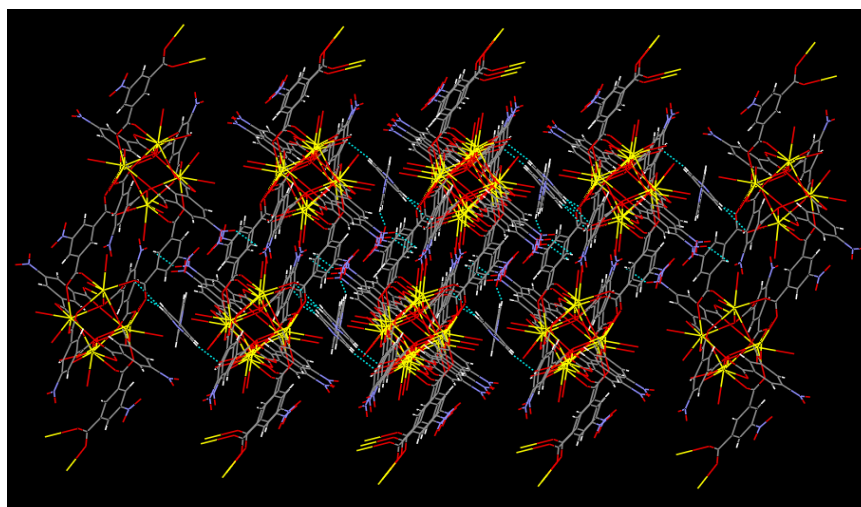

**Fig. S2.** View of hydrogen-bond interaction between 4,4'-bipy and frameworks in **1**.

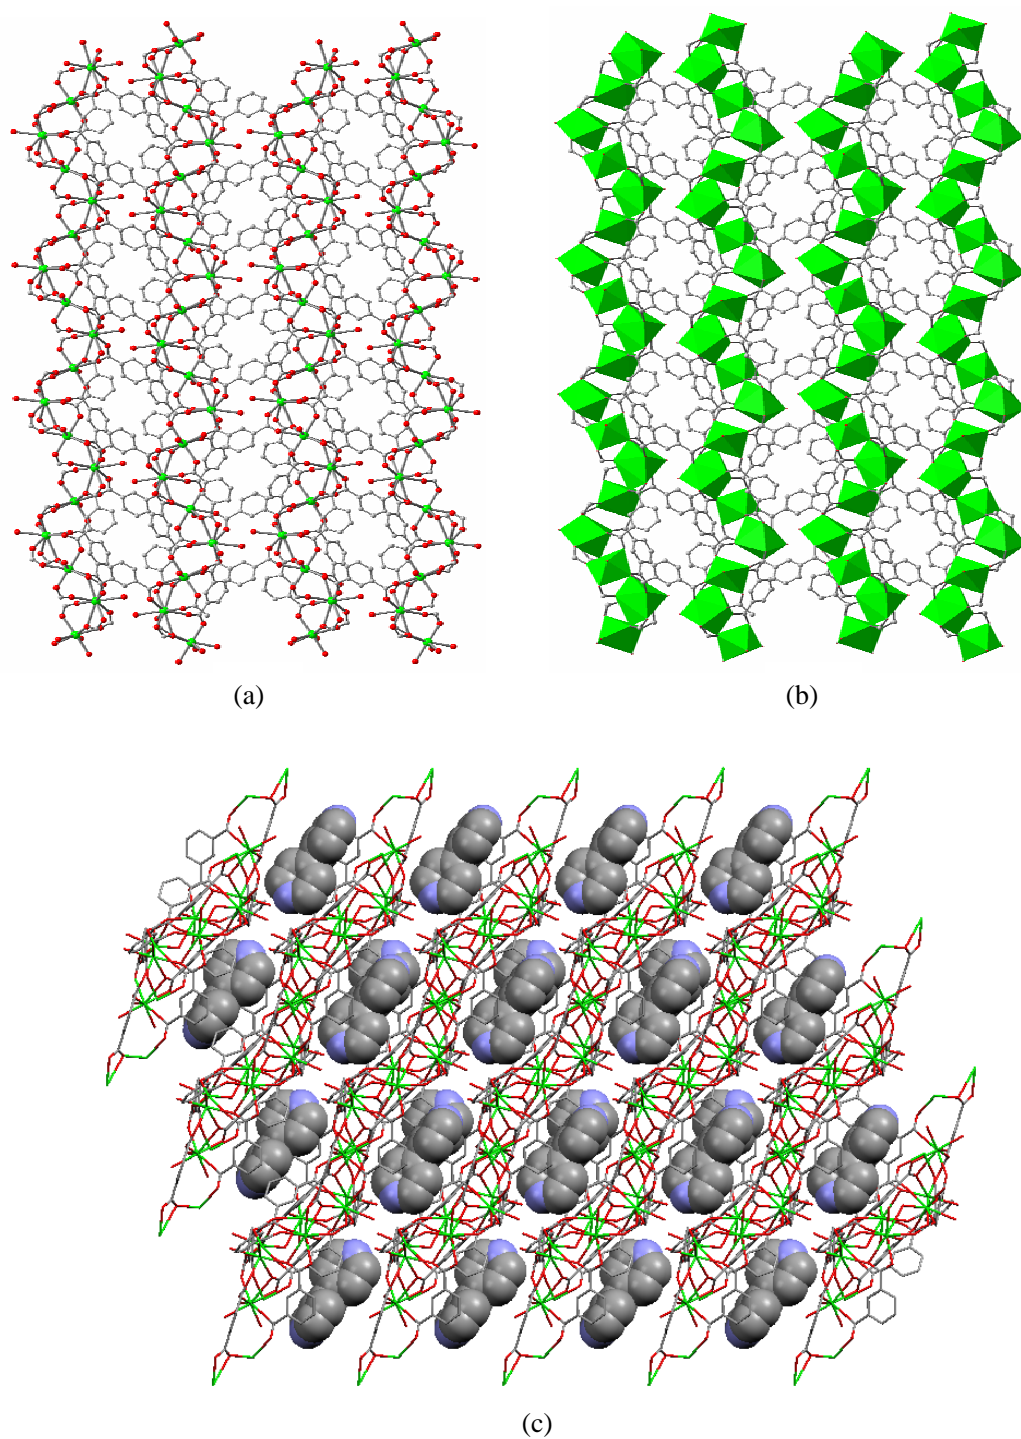

**Fig. S3.** (a) and (b) View of two-dimensional layer structure in **2**. (c) View down the a-axis of the structure of **2** showing the 4,4'-bipy molecules with space-filling representation. The nitro groups of ligands are omitted for clarity. Color code: Pr, green; O, red; C, grey.

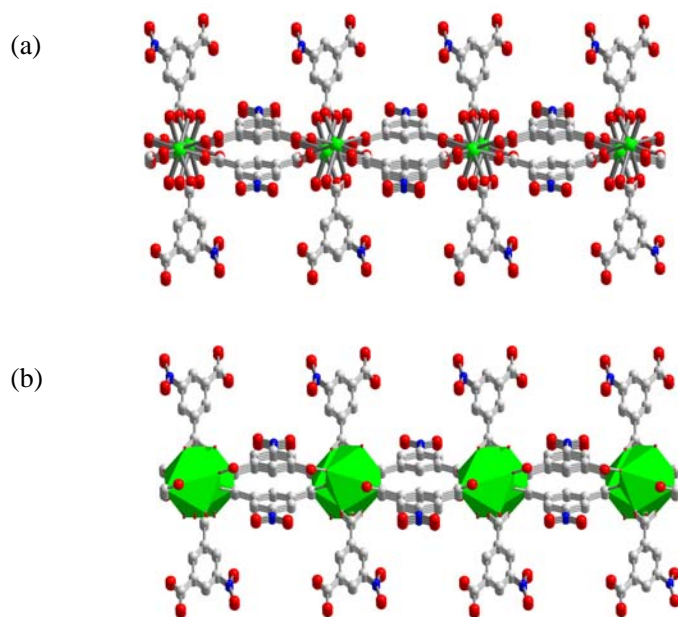

**Fig. S4.** View two-dimensional layer along the  $a$ -axis direction (e) and (f) in **4**. Colour code: Pr, green; O, red; C, grey; N, blue.

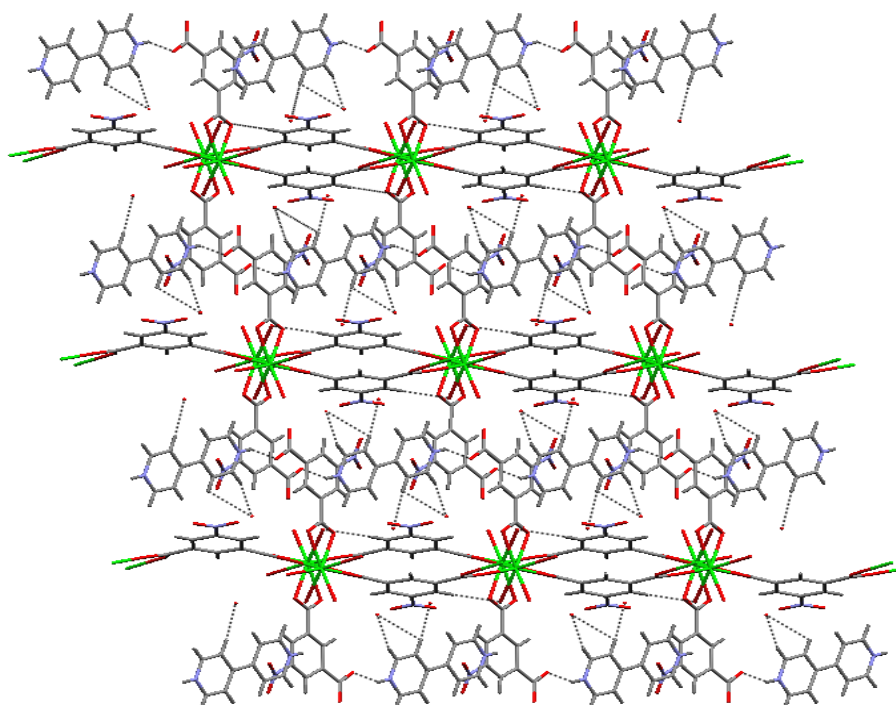

**Fig. S5.** View of hydrogen-bond interaction between 4,4'-bipy (or water molecules) and frameworks in **4**.

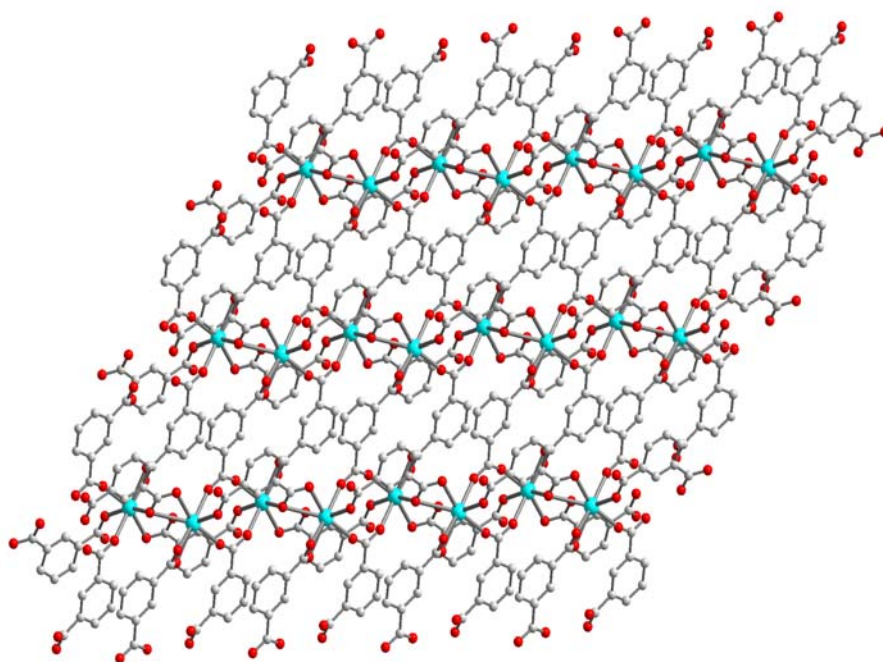

**Fig. S6.** View of two-dimensional layer along the [001] direction of **7**. The nitro groups of ligands are omitted for clarity.. The nitro groups of ligands are omitted for clarity. colour code: Eu, cyan; O, red; C, grey.

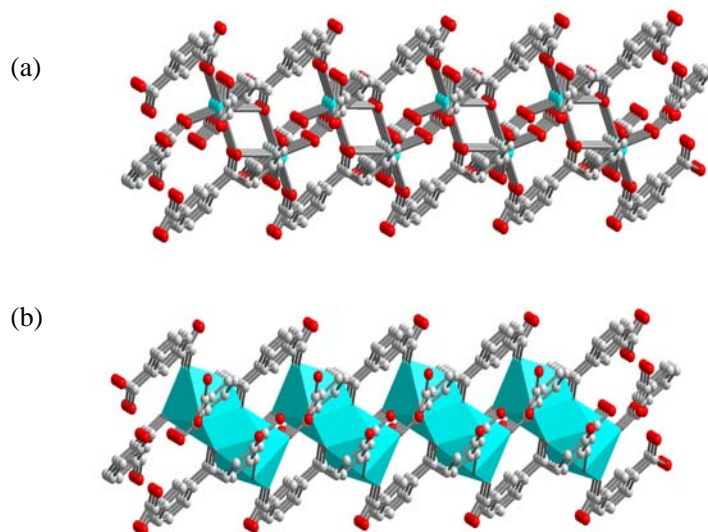

**Fig. S7.** View of two-dimensional layer and along the [100] direction (a) and (b) in **7**. The nitro groups of ligands are omitted for clarity. colour code: Eu, cyan; O, red; C, grey.

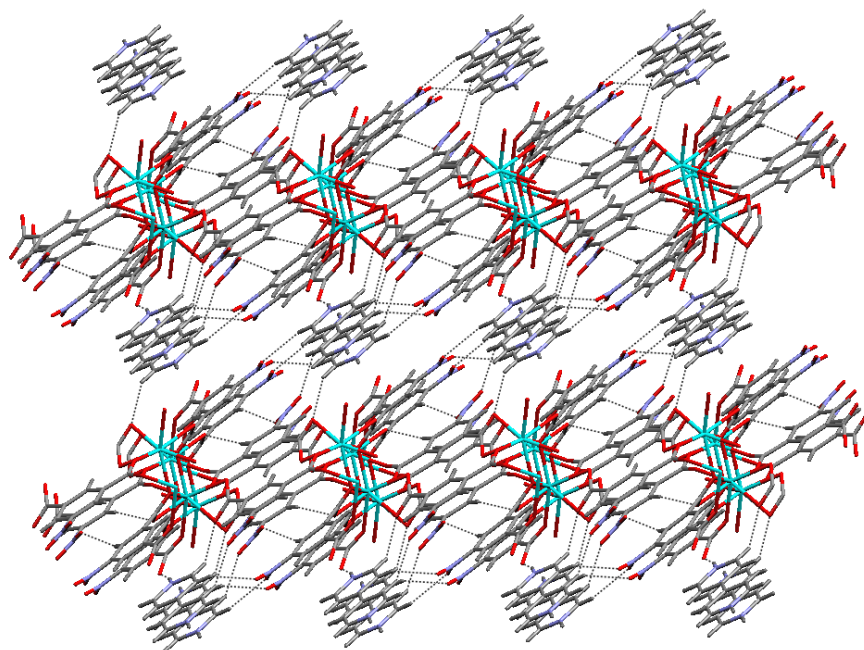

**Fig.e S8.** View of hydrogen-bond interaction between 4,4'-bipy and frameworks in 7.

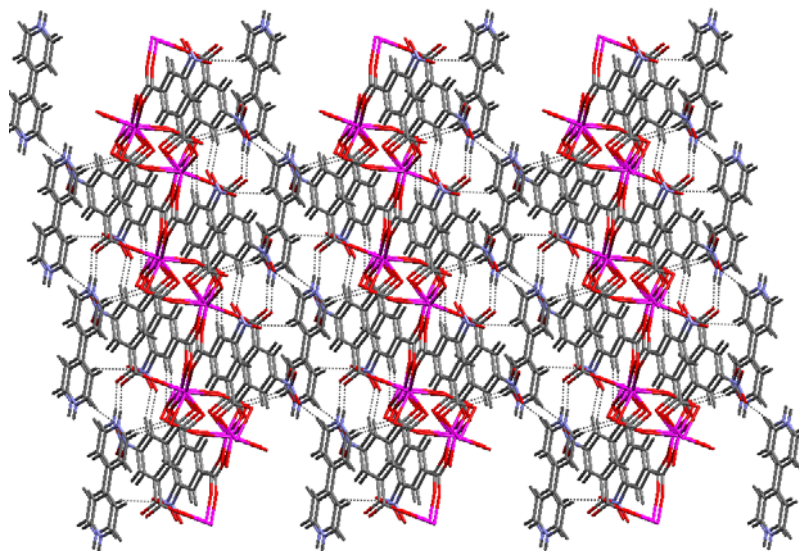

**Fig. S9.** View of hydrogen-bond interaction between 4,4'-bipy and frameworks in 9.

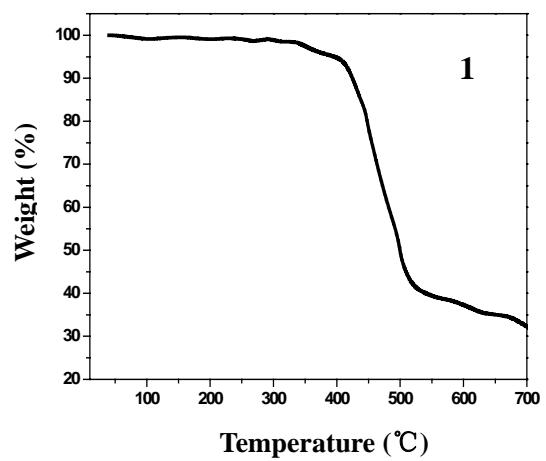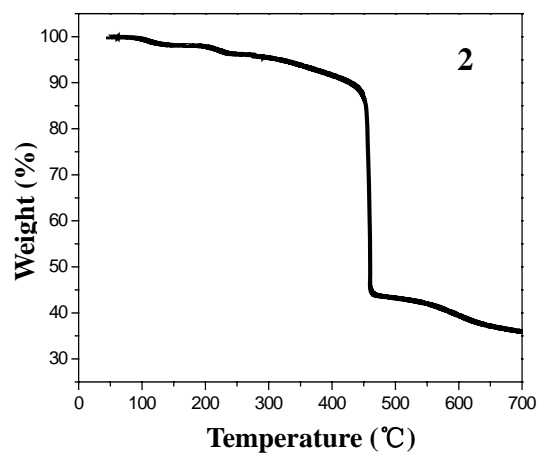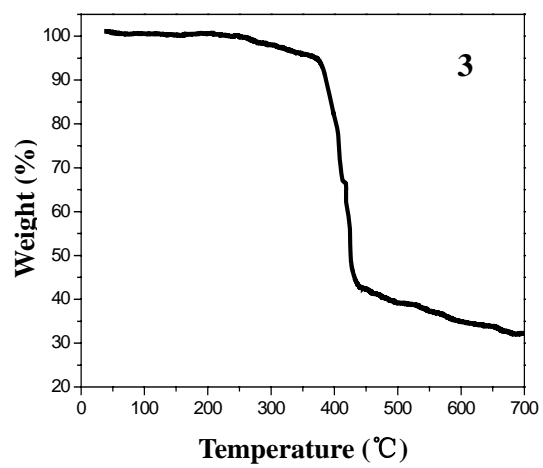

**Fig. S10.** Thermogravimetric curve for **1**, **2**, and **3**.

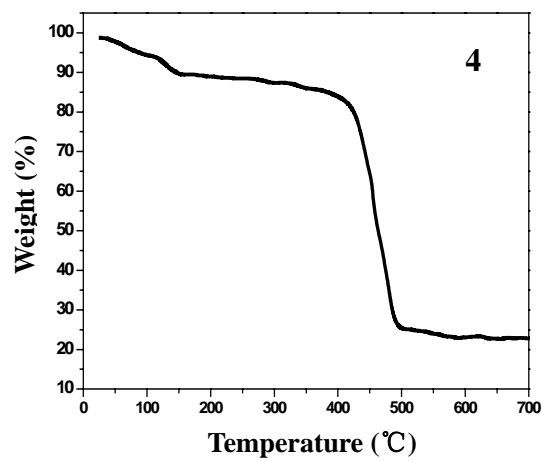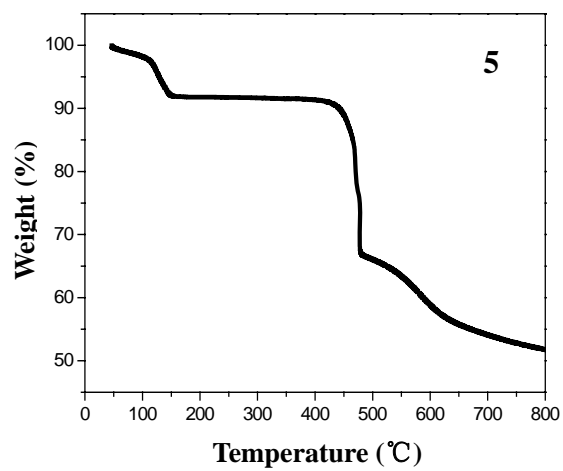

**Fig. S11.** Thermogravimetric curve for **4** and **5**.



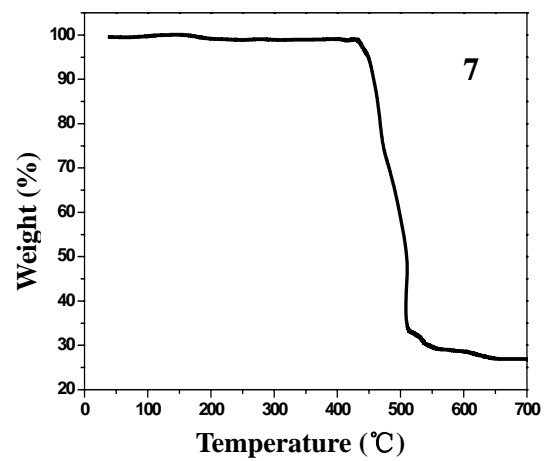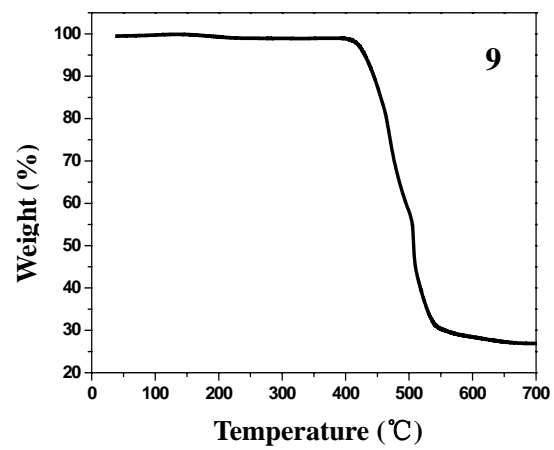

**Fig. S12.** Thermogravimetric curve for **7** and **9**.

**Table S1.** Selected bond lengths [Å] and angles [°] for **1-10**.

| <b>1</b>                                       |            |                                               |            |
|------------------------------------------------|------------|-----------------------------------------------|------------|
| La(1)-O(8)                                     | 2.413(4)   | La(2)-O(34) <sup>#3</sup>                     | 2.363(3)   |
| La(1)-O(28) <sup>#1</sup>                      | 2.417(4)   | La(2)-O(13)                                   | 2.423(4)   |
| La(1)-O(14)                                    | 2.419(3)   | La(2)-O(1)                                    | 2.431(4)   |
| La(1)-O(2)                                     | 2.443(4)   | La(2)-O(25)                                   | 2.510(4)   |
| La(1)-O(15) <sup>#2</sup>                      | 2.459(3)   | La(2)-O(9)                                    | 2.543(4)   |
| La(1)-O(19)                                    | 2.530(4)   | La(2)-O(20)                                   | 2.564(3)   |
| La(1)-O(37)                                    | 2.676(4)   | La(2)-O(38)                                   | 2.571(4)   |
| La(1)-O(20)                                    | 2.930(4)   | La(2)-O(26)                                   | 2.915(5)   |
| La(3)-O(32)                                    | 2.416(4)   | La(4)-O(16) <sup>#5</sup>                     | 2.404(3)   |
| La(3)-O(10)                                    | 2.481(4)   | La(4)-O(31)                                   | 2.419(3)   |
| La(3)-O(21)                                    | 2.487(4)   | La(4)-O(22)                                   | 2.444(5)   |
| La(3)-O(33) <sup>#3</sup>                      | 2.494(4)   | La(4)-O(7) <sup>#4</sup>                      | 2.449(4)   |
| La(3)-O(26)                                    | 2.540(4)   | La(4)-O(27)                                   | 2.465(4)   |
| La(3)-O(4) <sup>#4</sup>                       | 2.564(3)   | La(4)-O(3) <sup>#4</sup>                      | 2.569(4)   |
| La(3)-O(39)                                    | 2.637(4)   | La(4)-O(40)                                   | 2.583(4)   |
| La(3)-O(9)                                     | 2.814(4)   | La(3)-O(3) <sup>#4</sup>                      | 2.874(4)   |
| O(8)-La(1)-O(28) <sup>#1</sup>                 | 106.78(16) | O(34) <sup>#3</sup> -La(2)-O(13)              | 137.71(14) |
| O(8)-La(1)-O(14)                               | 142.86(12) | O(34) <sup>#3</sup> -La(2)-O(1)               | 83.69(15)  |
| O(28) <sup>#1</sup> -La(1)-O(14)               | 97.01(16)  | O(13)-La(2)-O(1)                              | 107.25(15) |
| O(8)-La(1)-O(2)                                | 71.37(14)  | O(34) <sup>#3</sup> -La(2)-O(25)              | 80.89(15)  |
| O(28) <sup>#1</sup> -La(1)-O(2)                | 79.88(18)  | O(13)-La(2)-O(25)                             | 70.18(14)  |
| O(14)-La(1)-O(2)                               | 85.65(13)  | O(1)-La(2)-O(25)                              | 151.05(16) |
| O(8)-La(1)-O(15) <sup>#2</sup>                 | 81.34(13)  | O(34) <sup>#3</sup> -La(2)-O(9)               | 76.55(13)  |
| O(28) <sup>#1</sup> -La(1)-O(15) <sup>#2</sup> | 85.96(16)  | O(13)-La(2)-O(9)                              | 142.66(14) |
| O(14)-La(1)-O(15) <sup>#2</sup>                | 129.32(12) | O(1)-La(2)-O(9)                               | 87.62(13)  |
| O(2)-La(1)-O(15) <sup>#2</sup>                 | 143.81(13) | O(25)-La(2)-O(9)                              | 112.15(13) |
| O(8)-La(1)-O(19)                               | 91.82(15)  | O(34) <sup>#3</sup> -La(2)-O(20)              | 151.25(13) |
| O(28) <sup>#1</sup> -La(1)-O(19)               | 154.62(16) | O(13)-La(2)-O(20)                             | 71.02(13)  |
| O(14)-La(1)-O(19)                              | 76.59(15)  | O(1)-La(2)-O(20)                              | 85.47(14)  |
| O(2)-La(1)-O(19)                               | 123.31(15) | O(25)-La(2)-O(20)                             | 118.75(15) |
| O(15) <sup>#2</sup> -La(1)-O(19)               | 79.81(13)  | O(9)-La(2)-O(20)                              | 76.46(11)  |
| O(8)-La(1)-O(37)                               | 146.70(12) | O(34) <sup>#3</sup> -La(2)-O(38)              | 73.86(13)  |
| O(28) <sup>#1</sup> -La(1)-O(37)               | 72.47(16)  | O(13)-La(2)-O(38)                             | 70.02(15)  |
| O(14)-La(1)-O(37)                              | 67.53(12)  | O(1)-La(2)-O(38)                              | 75.46(14)  |
| O(2)-La(1)-O(37)                               | 138.01(14) | O(25)-La(2)-O(38)                             | 76.78(15)  |
| O(15) <sup>#2</sup> -La(1)-O(37)               | 65.36(12)  | O(9)-La(2)-O(38)                              | 147.20(13) |
| O(19)-La(1)-O(37)                              | 82.48(15)  | O(20)-La(2)-O(38)                             | 128.53(12) |
| O(8)-La(1)-O(20)                               | 78.00(12)  | O(16) <sup>#5</sup> -La(4)-O(31)              | 140.59(12) |
| O(28) <sup>#1</sup> -La(1)-O(20)               | 152.62(15) | O(16) <sup>#5</sup> -La(4)-O(22)              | 77.70(16)  |
| O(14)-La(1)-O(20)                              | 68.22(12)  | O(31)-La(4)-O(22)                             | 102.31(16) |
| O(2)-La(1)-O(20)                               | 76.22(14)  | O(16) <sup>#5</sup> -La(4)-O(7) <sup>#4</sup> | 91.85(14)  |

|                                               |            |                                               |            |
|-----------------------------------------------|------------|-----------------------------------------------|------------|
| O(15) <sup>#2</sup> -La(1)-O(20)              | 121.34(12) | O(31)-La(4)-O(7) <sup>#4</sup>                | 78.40(13)  |
| O(19)-La(1)-O(20)                             | 47.14(11)  | O(22)-La(4)-O(7) <sup>#4</sup>                | 164.46(19) |
| O(37)-La(1)-O(20)                             | 118.50(13) | O(16) <sup>#5</sup> -La(4)-O(27)              | 73.17(13)  |
| O(32)-La(3)-O(10)                             | 77.41(13)  | O(31)-La(4)-O(27)                             | 145.67(13) |
| O(32)-La(3)-O(21)                             | 81.87(12)  | O(22)-La(4)-O(27)                             | 89.53(19)  |
| O(10)-La(3)-O(21)                             | 81.49(18)  | O(7) <sup>#4</sup> -La(4)-O(27)               | 98.51(16)  |
| O(32)-La(3)-O(33) <sup>#3</sup>               | 128.56(11) | O(16) <sup>#5</sup> -La(4)-O(3) <sup>#4</sup> | 145.55(12) |
| O(10)-La(3)-O(33) <sup>#3</sup>               | 106.46(16) | O(31)-La(4)-O(3) <sup>#4</sup>                | 73.82(12)  |
| O(21)-La(3)-O(33) <sup>#3</sup>               | 149.34(12) | O(22)-La(4)-O(3) <sup>#4</sup>                | 99.64(17)  |
| O(32)-La(3)-O(26)                             | 150.70(13) | O(7) <sup>#4</sup> -La(4)-O(3) <sup>#4</sup>  | 95.47(13)  |
| O(10)-La(3)-O(26)                             | 111.52(14) | O(27)-La(4)-O(3) <sup>#4</sup>                | 72.46(13)  |
| O(21)-La(3)-O(26)                             | 72.45(13)  | O(16) <sup>#5</sup> -La(4)-O(40)              | 68.81(13)  |
| O(33) <sup>#3</sup> -La(3)-O(26)              | 77.16(12)  | O(31)-La(4)-O(40)                             | 71.78(13)  |
| O(32)-La(3)-O(4) <sup>#4</sup>                | 76.62(13)  | O(22)-La(4)-O(40)                             | 89.85(19)  |
| O(10)-La(3)-O(4) <sup>#4</sup>                | 145.61(15) | O(7) <sup>#4</sup> -La(4)-O(40)               | 75.53(14)  |
| O(21)-La(3)-O(4) <sup>#4</sup>                | 116.39(14) | O(27)-La(4)-O(40)                             | 141.19(14) |
| O(33) <sup>#3</sup> -La(3)-O(4) <sup>#4</sup> | 73.75(12)  | O(3) <sup>#4</sup> -La(4)-O(40)               | 145.52(12) |
| O(26)-La(3)-O(4) <sup>#4</sup>                | 102.14(14) | O(10)-La(3)-O(3) <sup>#4</sup>                | 136.50(14) |
| O(32)-La(3)-O(39)                             | 70.33(13)  | O(21)-La(3)-O(3) <sup>#4</sup>                | 68.94(13)  |
| O(10)-La(3)-O(39)                             | 71.24(17)  | O(33) <sup>#3</sup> -La(3)-O(3) <sup>#4</sup> | 115.33(11) |
| O(21)-La(3)-O(39)                             | 144.36(14) | O(26)-La(3)-O(3) <sup>#4</sup>                | 89.66(12)  |
| O(33) <sup>#3</sup> -La(3)-O(39)              | 63.43(13)  | O(4) <sup>#4</sup> -La(3)-O(3) <sup>#4</sup>  | 47.47(11)  |
| O(26)-La(3)-O(39)                             | 138.74(13) | O(39)-La(3)-O(3) <sup>#4</sup>                | 117.16(14) |
| O(4) <sup>#4</sup> -La(3)-O(39)               | 79.01(15)  | O(9)-La(3)-O(3) <sup>#4</sup>                 | 149.80(10) |
| O(32)-La(3)-O(9)                              | 125.46(11) | O(26)-La(3)-O(9)                              | 67.03(12)  |
| O(10)-La(3)-O(9)                              | 48.27(11)  | O(4) <sup>#4</sup> -La(3)-O(9)                | 152.65(11) |
| O(21)-La(3)-O(9)                              | 85.25(14)  | O(39)-La(3)-O(9)                              | 92.92(14)  |
| O(33) <sup>#3</sup> -La(3)-O(9)               | 79.26(11)  | O(32)-La(3)-O(3) <sup>#4</sup>                | 67.67(11)  |

## 2

|                           |          |                           |          |
|---------------------------|----------|---------------------------|----------|
| Pr(1)-O(8)                | 2.374(4) | Pr(3)-O(33) <sup>#3</sup> | 2.383(4) |
| Pr(1)-O(27)               | 2.373(4) | Pr(3)-O(3)                | 2.413(4) |
| Pr(1)-O(16) <sup>#1</sup> | 2.379(4) | Pr(3)-O(25)               | 2.427(4) |
| Pr(1)-O(20)               | 2.396(4) | Pr(3)-O(32)               | 2.451(4) |
| Pr(1)-O(9) <sup>#2</sup>  | 2.416(4) | Pr(3)-O(14)               | 2.462(5) |
| Pr(1)-O(1)                | 2.484(4) | Pr(3)-O(22) <sup>#4</sup> | 2.525(4) |
| Pr(1)-O(37)               | 2.628(4) | Pr(3)-O(39)               | 2.597(4) |
| Pr(1)-O(2)                | 2.908(4) | Pr(3)-O(26)               | 2.836(4) |
| Pr(2)-O(31)               | 2.330(3) | Pr(3)-O(21) <sup>#4</sup> | 2.893(4) |
| Pr(2)-O(19)               | 2.383(4) | Pr(4)-O(10) <sup>#5</sup> | 2.352(3) |
| Pr(2)-O(7)                | 2.384(4) | Pr(4)-O(4)                | 2.383(4) |
| Pr(2)-O(13)               | 2.435(4) | Pr(4)-O(34) <sup>#3</sup> | 2.388(3) |
| Pr(2)-O(26)               | 2.505(4) | Pr(4)-O(28) <sup>#4</sup> | 2.404(4) |
| Pr(2)-O(38)               | 2.525(4) | Pr(4)-O(15)               | 2.409(5) |
| Pr(2)-O(2)                | 2.542(4) | Pr(4)-O(21) <sup>#4</sup> | 2.523(4) |

|                                                |            |                                                |            |
|------------------------------------------------|------------|------------------------------------------------|------------|
| Pr(2)-O(14)                                    | 3.040(4)   | Pr(4)-O(40)                                    | 2.552(4)   |
| O(8)-Pr(1)-O(27)                               | 142.53(14) | O(31)-Pr(2)-O(19)                              | 85.69(15)  |
| O(8)-Pr(1)-O(16) <sup>#1</sup>                 | 96.41(17)  | O(31)-Pr(2)-O(7)                               | 137.85(16) |
| O(27)-Pr(1)-O(16) <sup>#1</sup>                | 107.38(16) | O(19)-Pr(2)-O(7)                               | 106.01(16) |
| O(8)-Pr(1)-O(20)                               | 85.11(14)  | O(31)-Pr(2)-O(13)                              | 81.99(17)  |
| O(27)-Pr(1)-O(20)                              | 71.76(15)  | O(19)-Pr(2)-O(13)                              | 156.2(2)   |
| O(16) <sup>#1</sup> -Pr(1)-O(20)               | 79.40(18)  | O(7)-Pr(2)-O(13)                               | 71.31(15)  |
| O(8)-Pr(1)-O(9) <sup>#2</sup>                  | 130.58(12) | O(31)-Pr(2)-O(26)                              | 75.98(14)  |
| O(27)-Pr(1)-O(9) <sup>#2</sup>                 | 80.91(14)  | O(19)-Pr(2)-O(26)                              | 87.72(14)  |
| O(16) <sup>#1</sup> -Pr(1)-O(9) <sup>#2</sup>  | 85.30(18)  | O(7)-Pr(2)-O(26)                               | 143.04(15) |
| O(20)-Pr(1)-O(9) <sup>#2</sup>                 | 142.72(13) | O(13)-Pr(2)-O(26)                              | 108.76(15) |
| O(8)-Pr(1)-O(1)                                | 77.54(16)  | O(31)-Pr(2)-O(38)                              | 73.06(14)  |
| O(27)-Pr(1)-O(1)                               | 91.07(16)  | O(19)-Pr(2)-O(38)                              | 76.57(15)  |
| O(16) <sup>#1</sup> -Pr(1)-O(1)                | 154.67(16) | O(7)-Pr(2)-O(38)                               | 70.81(16)  |
| O(20)-Pr(1)-O(1)                               | 123.82(14) | O(13)-Pr(2)-O(38)                              | 80.37(19)  |
| O(9) <sup>#2</sup> -Pr(1)-O(1)                 | 80.54(13)  | O(26)-Pr(2)-O(38)                              | 146.09(13) |
| O(8)-Pr(1)-O(37)                               | 67.89(14)  | O(31)-Pr(2)-O(2)                               | 151.52(14) |
| O(27)-Pr(1)-O(37)                              | 146.69(15) | O(19)-Pr(2)-O(2)                               | 84.21(15)  |
| O(16) <sup>#1</sup> -Pr(1)-O(37)               | 72.24(16)  | O(7)-Pr(2)-O(2)                                | 70.63(14)  |
| O(20)-Pr(1)-O(37)                              | 137.60(16) | O(13)-Pr(2)-O(2)                               | 115.60(18) |
| O(9) <sup>#2</sup> -Pr(1)-O(37)                | 65.79(14)  | O(26)-Pr(2)-O(2)                               | 77.06(13)  |
| O(1)-Pr(1)-O(37)                               | 82.79(15)  | O(38)-Pr(2)-O(2)                               | 129.61(13) |
| O(8)-Pr(1)-O(2)                                | 68.42(13)  | O(33) <sup>#3</sup> -Pr(3)-O(3)                | 80.83(13)  |
| O(27)-Pr(1)-O(2)                               | 77.52(13)  | O(33) <sup>#3</sup> -Pr(3)-O(25)               | 79.27(15)  |
| O(16) <sup>#1</sup> -Pr(1)-O(2)                | 152.24(17) | O(3)-Pr(3)-O(25)                               | 80.47(19)  |
| O(20)-Pr(1)-O(2)                               | 76.32(13)  | O(33) <sup>#3</sup> -Pr(3)-O(32)               | 130.65(12) |
| O(9) <sup>#2</sup> -Pr(1)-O(2)                 | 122.35(12) | O(3)-Pr(3)-O(32)                               | 148.52(13) |
| O(1)-Pr(1)-O(2)                                | 47.55(11)  | O(25)-Pr(3)-O(32)                              | 103.33(17) |
| O(37)-Pr(1)-O(2)                               | 118.91(13) | O(33) <sup>#3</sup> -Pr(3)-O(14)               | 147.94(13) |
| O(22) <sup>#4</sup> -Pr(3)-O(21) <sup>#4</sup> | 47.33(11)  | O(3)-Pr(3)-O(14)                               | 72.94(15)  |
| O(39)-Pr(3)-O(21) <sup>#4</sup>                | 116.07(13) | O(25)-Pr(3)-O(14)                              | 113.27(17) |
| O(26)-Pr(3)-O(21) <sup>#4</sup>                | 148.16(10) | O(32)-Pr(3)-O(14)                              | 77.04(14)  |
| O(10) <sup>#5</sup> -Pr(4)-O(4)                | 80.91(15)  | O(33) <sup>#3</sup> -Pr(3)-O(22) <sup>#4</sup> | 76.98(14)  |
| O(10) <sup>#5</sup> -Pr(4)-O(34) <sup>#3</sup> | 139.94(13) | O(3)-Pr(3)-O(22) <sup>#4</sup>                 | 118.49(15) |
| O(4)-Pr(4)-O(34) <sup>#3</sup>                 | 99.48(15)  | O(25)-Pr(3)-O(22) <sup>#4</sup>                | 146.23(15) |
| O(10) <sup>#5</sup> -Pr(4)-O(28) <sup>#4</sup> | 91.74(14)  | O(32)-Pr(3)-O(22) <sup>#4</sup>                | 75.43(13)  |
| O(28) <sup>#4</sup> -Pr(4)-O(15)               | 98.75(17)  | O(14)-Pr(3)-O(22) <sup>#4</sup>                | 99.49(17)  |
| O(28) <sup>#4</sup> -Pr(4)-O(21) <sup>#4</sup> | 96.86(14)  | O(33) <sup>#3</sup> -Pr(3)-O(39)               | 70.27(14)  |
| O(15)-Pr(4)-O(21) <sup>#4</sup>                | 73.64(13)  | O(3)-Pr(3)-O(39)                               | 142.35(16) |
| O(10) <sup>#5</sup> -Pr(4)-O(40)               | 69.21(13)  | O(25)-Pr(3)-O(39)                              | 71.05(17)  |
| O(4)-Pr(4)-O(40)                               | 91.4(2)    | O(32)-Pr(3)-O(39)                              | 64.66(14)  |
| O(28) <sup>#4</sup> -Pr(4)-O(40)               | 76.11(15)  | O(14)-Pr(3)-O(39)                              | 141.00(15) |
| O(15)-Pr(4)-O(40)                              | 141.67(13) | O(22) <sup>#4</sup> -Pr(3)-O(39)               | 78.50(15)  |
| O(21) <sup>#4</sup> -Pr(4)-O(40)               | 144.29(12) | O(33) <sup>#3</sup> -Pr(3)-O(26)               | 127.09(12) |

|                                                |            |                                                |            |
|------------------------------------------------|------------|------------------------------------------------|------------|
| O(4)-Pr(4)-O(28) <sup>#4</sup>                 | 167.2(2)   | O(3)-Pr(3)-O(26)                               | 82.66(14)  |
| O(34) <sup>#3</sup> -Pr(4)-O(28) <sup>#4</sup> | 79.38(13)  | O(25)-Pr(3)-O(26)                              | 48.48(13)  |
| O(10) <sup>#5</sup> -Pr(4)-O(15)               | 73.07(15)  | O(32)-Pr(3)-O(26)                              | 77.47(13)  |
| O(4)-Pr(4)-O(15)                               | 89.2(2)    | O(14)-Pr(3)-O(26)                              | 67.91(15)  |
| O(34) <sup>#3</sup> -Pr(4)-O(15)               | 146.65(14) | O(22) <sup>#4</sup> -Pr(3)-O(26)               | 152.13(13) |
| O(10) <sup>#5</sup> -Pr(4)-O(21) <sup>#4</sup> | 146.50(13) | O(39)-Pr(3)-O(26)                              | 95.71(14)  |
| O(4)-Pr(4)-O(21) <sup>#4</sup>                 | 95.00(17)  | O(33) <sup>#3</sup> -Pr(3)-O(21) <sup>#4</sup> | 67.13(11)  |
| O(34) <sup>#3</sup> -Pr(4)-O(21) <sup>#4</sup> | 73.56(12)  | O(3)-Pr(3)-O(21) <sup>#4</sup>                 | 71.17(14)  |
| O(14)-Pr(3)-O(21) <sup>#4</sup>                | 86.86(14)  | O(25)-Pr(3)-O(21) <sup>#4</sup>                | 138.59(16) |
| O(34) <sup>#3</sup> -Pr(4)-O(40)               | 70.73(12)  | O(32)-Pr(3)-O(21) <sup>#4</sup>                | 116.69(13) |

### 3

|                                               |            |                                  |            |
|-----------------------------------------------|------------|----------------------------------|------------|
| La(1)-O(7)                                    | 2.408(3)   | La(1)-O(1)                       | 2.562(3)   |
| La(1)-O(8) <sup>#1</sup>                      | 2.480(3)   | La(1)-O(14)                      | 2.583(4)   |
| La(1)-O(9) <sup>#2</sup>                      | 2.485(4)   | La(1)-O(2)                       | 2.584(4)   |
| La(1)-O(10) <sup>#3</sup>                     | 2.493(4)   | La(1)-O(13)                      | 2.539(3)   |
| O(7)-La(1)-O(8) <sup>#1</sup>                 | 100.87(12) | O(13)-La(1)-O(2)                 | 144.12(11) |
| O(7)-La(1)-O(9) <sup>#2</sup>                 | 150.73(14) | O(1)-La(1)-O(2)                  | 50.77(10)  |
| O(8) <sup>#1</sup> -La(1)-O(9) <sup>#2</sup>  | 74.44(13)  | O(14)-La(1)-O(2)                 | 127.97(14) |
| O(7)-La(1)-O(10) <sup>#3</sup>                | 90.02(12)  | O(8) <sup>#1</sup> -La(1)-O(2)   | 73.71(13)  |
| O(8) <sup>#1</sup> -La(1)-O(10) <sup>#3</sup> | 145.90(13) | O(9) <sup>#2</sup> -La(1)-O(2)   | 127.78(12) |
| O(9) <sup>#2</sup> -La(1)-O(10) <sup>#3</sup> | 110.21(13) | O(10) <sup>#3</sup> -La(1)-O(2)  | 77.92(13)  |
| O(7)-La(1)-O(13)                              | 83.56(12)  | O(13)-La(1)-O(14)                | 69.75(14)  |
| O(8) <sup>#1</sup> -La(1)-O(13)               | 139.93(13) | O(1)-La(1)-O(14)                 | 147.03(12) |
| O(9) <sup>#2</sup> -La(1)-O(13)               | 82.59(12)  | O(7)-La(1)-O(2)                  | 75.88(12)  |
| O(10) <sup>#3</sup> -La(1)-O(13)              | 72.94(12)  | O(10) <sup>#3</sup> -La(1)-O(14) | 139.75(13) |
| O(7)-La(1)-O(1)                               | 125.87(12) | O(13)-La(1)-O(1)                 | 133.79(11) |
| O(8) <sup>#1</sup> -La(1)-O(1)                | 75.00(13)  | O(7)-La(1)-O(14)                 | 71.49(13)  |
| O(9) <sup>#2</sup> -La(1)-O(1)                | 81.54(13)  | O(8) <sup>#1</sup> -La(1)-O(14)  | 74.04(14)  |
| O(10) <sup>#3</sup> -La(1)-O(1)               | 72.50(11)  | O(9) <sup>#2</sup> -La(1)-O(14)  | 79.55(14)  |

### 4

|                                               |           |                                 |           |
|-----------------------------------------------|-----------|---------------------------------|-----------|
| Pr(1)-O(10) <sup>#1</sup>                     | 2.391(2)  | Pr(1)-O(13)                     | 2.510(2)  |
| Pr(1)-O(7)                                    | 2.412(2)  | Pr(1)-O(14)                     | 2.535(2)  |
| Pr(1)-O(8) <sup>#2</sup>                      | 2.430(2)  | Pr(1)-O(1)                      | 2.534(2)  |
| Pr(1)-O(9) <sup>#3</sup>                      | 2.482(2)  | Pr(1)-O(2)                      | 2.551(2)  |
| O(10) <sup>#1</sup> -Pr(1)-O(7)               | 89.15(8)  | O(13)-Pr(1)-O(2)                | 145.17(6) |
| O(10) <sup>#1</sup> -Pr(1)-O(8) <sup>#2</sup> | 158.25(8) | O(14)-Pr(1)-O(2)                | 129.45(8) |
| O(7)-Pr(1)-O(8) <sup>#2</sup>                 | 102.35(8) | O(1)-Pr(1)-O(2)                 | 51.43(7)  |
| O(10) <sup>#1</sup> -Pr(1)-O(9) <sup>#3</sup> | 104.60(7) | O(14)-Pr(1)-O(1)                | 148.63(7) |
| O(7)-Pr(1)-O(9) <sup>#3</sup>                 | 147.53(7) | O(10) <sup>#1</sup> -Pr(1)-O(2) | 75.86(8)  |
| O(8) <sup>#2</sup> -Pr(1)-O(9) <sup>#3</sup>  | 75.39(8)  | O(7)-Pr(1)-O(2)                 | 77.98(8)  |
| O(10) <sup>#1</sup> -Pr(1)-O(13)              | 88.61(8)  | O(8) <sup>#2</sup> -Pr(1)-O(2)  | 124.30(8) |
| O(7)-Pr(1)-O(13)                              | 70.70(8)  | O(9) <sup>#3</sup> -Pr(1)-O(2)  | 77.18(8)  |
| O(8) <sup>#2</sup> -Pr(1)-O(13)               | 78.13(8)  | O(9) <sup>#3</sup> -Pr(1)-O(1)  | 75.83(7)  |
| O(9) <sup>#3</sup> -Pr(1)-O(13)               | 137.47(8) | O(13)-Pr(1)-O(1)                | 127.79(7) |

|                                  |           |                                 |           |
|----------------------------------|-----------|---------------------------------|-----------|
| O(10) <sup>#1</sup> -Pr(1)-O(14) | 71.94(9)  | O(13)-Pr(1)-O(14)               | 71.52(7)  |
| O(7)-Pr(1)-O(14)                 | 137.86(7) | O(10) <sup>#1</sup> -Pr(1)-O(1) | 126.31(8) |
| O(8) <sup>#2</sup> -Pr(1)-O(14)  | 87.42(9)  | O(7)-Pr(1)-O(1)                 | 72.39(7)  |
| O(9) <sup>#3</sup> -Pr(1)-O(14)  | 74.60(8)  | O(8) <sup>#2</sup> -Pr(1)-O(1)  | 75.17(8)  |

### 5

|                                              |            |                                 |            |
|----------------------------------------------|------------|---------------------------------|------------|
| Nd(1)-O(1)                                   | 2.3751(16) | Nd(1)-O(7)                      | 2.5057(17) |
| Nd(1)-O(4) <sup>#1</sup>                     | 2.4039(16) | Nd(1)-O(8)                      | 2.5422(15) |
| Nd(1)-O(3) <sup>#2</sup>                     | 2.4209(16) | Nd(1)-O(13)                     | 2.5351(18) |
| Nd(1)-O(2) <sup>#3</sup>                     | 2.4489(16) | Nd(1)-O(14)                     | 2.4921(16) |
| O(1)-Nd(1)-O(4) <sup>#1</sup>                | 89.36(5)   | O(2) <sup>#3</sup> -Nd(1)-O(13) | 74.15(6)   |
| O(1)-Nd(1)-O(3) <sup>#2</sup>                | 154.72(5)  | O(14)-Nd(1)-O(13)               | 71.04(6)   |
| O(4) <sup>#1</sup> -Nd(1)-O(3) <sup>#2</sup> | 105.24(5)  | O(7)-Nd(1)-O(13)                | 147.20(5)  |
| O(1)-Nd(1)-O(2) <sup>#3</sup>                | 102.88(6)  | O(8)-Nd(1)-O(13)                | 129.66(6)  |
| O(4) <sup>#1</sup> -Nd(1)-O(2) <sup>#3</sup> | 147.14(5)  | O(1)-Nd(1)-C(15)                | 102.06(7)  |
| O(3) <sup>#2</sup> -Nd(1)-O(2) <sup>#3</sup> | 76.02(6)   | O(14)-Nd(1)-O(8)                | 144.57(5)  |
| O(1)-Nd(1)-O(14)                             | 86.11(6)   | O(7)-Nd(1)-O(8)                 | 51.84(4)   |
| O(4) <sup>#1</sup> -Nd(1)-O(14)              | 70.95(5)   | O(1)-Nd(1)-O(13)                | 72.35(6)   |
| O(3) <sup>#2</sup> -Nd(1)-O(14)              | 79.57(6)   | O(4) <sup>#1</sup> -Nd(1)-O(13) | 138.62(5)  |
| O(2) <sup>#3</sup> -Nd(1)-O(14)              | 139.31(6)  | O(3) <sup>#2</sup> -Nd(1)-O(13) | 83.28(6)   |
| O(1)-Nd(1)-O(7)                              | 127.52(6)  | O(2) <sup>#3</sup> -Nd(1)-O(8)  | 75.42(6)   |
| O(4) <sup>#1</sup> -Nd(1)-O(7)               | 72.75(5)   | O(1)-Nd(1)-O(8)                 | 76.61(6)   |
| O(3) <sup>#2</sup> -Nd(1)-O(7)               | 77.18(6)   | O(4) <sup>#1</sup> -Nd(1)-O(8)  | 78.06(6)   |
| O(2) <sup>#3</sup> -Nd(1)-O(7)               | 75.70(6)   | O(3) <sup>#2</sup> -Nd(1)-O(8)  | 126.04(5)  |
| O(14)-Nd(1)-O(7)                             | 129.31(5)  |                                 |            |

### 6

|                                           |            |                             |            |
|-------------------------------------------|------------|-----------------------------|------------|
| Sm-O(2) <sup>#1</sup>                     | 2.315(4)   | Sm-O(4) <sup>#4</sup>       | 2.457(4)   |
| Sm-O(1)                                   | 2.321(4)   | Sm-O(7)                     | 2.457(4)   |
| Sm-O(9) <sup>#2</sup>                     | 2.327(4)   | Sm-O(3) <sup>#4</sup>       | 2.454(4)   |
| Sm-O(8) <sup>#3</sup>                     | 2.388(4)   | Sm-O(8)                     | 2.838(4)   |
| O(2) <sup>#1</sup> -Sm-O(1)               | 83.79(14)  | O(7)-Sm-O(8)                | 48.61(12)  |
| O(2) <sup>#1</sup> -Sm-O(9) <sup>#2</sup> | 84.51(15)  | C(8) <sup>#4</sup> -Sm-O(8) | 67.86(14)  |
| O(1)-Sm-O(9) <sup>#2</sup>                | 82.34(17)  | O(2) <sup>#1</sup> -Sm-O(8) | 154.28(13) |
| O(2) <sup>#1</sup> -Sm-O(8) <sup>#3</sup> | 95.12(15)  | O(1)-Sm-O(8)                | 108.77(14) |
| O(1)-Sm-O(8) <sup>#3</sup>                | 76.28(16)  | O(9) <sup>#2</sup> -Sm-O(8) | 118.70(13) |
| O(9) <sup>#2</sup> -Sm-O(8) <sup>#3</sup> | 158.52(16) | O(8) <sup>#3</sup> -Sm-O(8) | 67.55(15)  |
| O(2) <sup>#1</sup> -Sm-O(3) <sup>#4</sup> | 106.56(15) | O(3) <sup>#4</sup> -Sm-O(8) | 67.34(14)  |
| O(1)-Sm-O(3) <sup>#4</sup>                | 163.33(14) | O(4) <sup>#4</sup> -Sm-O(8) | 78.61(13)  |
| O(9) <sup>#2</sup> -Sm-O(3) <sup>#4</sup> | 85.64(15)  | O(2) <sup>#1</sup> -Sm-O(7) | 157.10(14) |
| O(8) <sup>#3</sup> -Sm-O(3) <sup>#4</sup> | 114.81(14) | O(1)-Sm-O(7)                | 84.65(15)  |
| O(2) <sup>#1</sup> -Sm-O(4) <sup>#4</sup> | 78.23(14)  | O(9) <sup>#2</sup> -Sm-O(7) | 74.39(14)  |
| O(1)-Sm-O(4) <sup>#4</sup>                | 143.02(15) | O(8) <sup>#3</sup> -Sm-O(7) | 101.24(14) |
| O(9) <sup>#2</sup> -Sm-O(4) <sup>#4</sup> | 127.01(17) | O(3) <sup>#4</sup> -Sm-O(7) | 81.01(15)  |
| O(8) <sup>#3</sup> -Sm-O(4) <sup>#4</sup> | 73.50(15)  | O(4) <sup>#4</sup> -Sm-O(7) | 121.70(14) |
| O(3) <sup>#4</sup> -Sm-O(4) <sup>#4</sup> | 53.44(14)  |                             |            |

## 7

|                                               |            |                                               |            |
|-----------------------------------------------|------------|-----------------------------------------------|------------|
| Eu(1)-O(8)                                    | 2.300(3)   | Eu(1)-O(9) <sup>#4</sup>                      | 2.456(3)   |
| Eu(1)-O(7) <sup>#1</sup>                      | 2.313(3)   | Eu(1)-O(2)                                    | 2.850(3)   |
| Eu(1)-O(3) <sup>#2</sup>                      | 2.315(3)   | Eu(1)-O(10) <sup>#4</sup>                     | 2.439(3)   |
| Eu(1)-O(2) <sup>#3</sup>                      | 2.374(3)   | Eu(1)-O(1)                                    | 2.437(3)   |
| O(8)-Eu(1)-O(7) <sup>#1</sup>                 | 83.93(9)   | O(10) <sup>#4</sup> -Eu(1)-O(2)               | 67.31(9)   |
| O(8)-Eu(1)-O(3) <sup>#2</sup>                 | 84.37(10)  | O(1)-Eu(1)-O(2)                               | 48.42(8)   |
| O(7) <sup>#1</sup> -Eu(1)-O(3) <sup>#2</sup>  | 82.17(11)  | O(9) <sup>#4</sup> -Eu(1)-O(2)                | 78.13(9)   |
| O(8)-Eu(1)-O(2) <sup>#3</sup>                 | 95.86(10)  | O(2) <sup>#3</sup> -Eu(1)-O(2)                | 67.06(9)   |
| O(7) <sup>#1</sup> -Eu(1)-O(2) <sup>#3</sup>  | 76.37(10)  | O(8)-Eu(1)-O(2)                               | 154.01(9)  |
| O(3) <sup>#2</sup> -Eu(1)-O(2) <sup>#3</sup>  | 158.38(10) | O(7) <sup>#1</sup> -Eu(1)-O(2)                | 109.20(9)  |
| O(8)-Eu(1)-O(10) <sup>#4</sup>                | 106.15(10) | O(3) <sup>#2</sup> -Eu(1)-O(2)                | 118.88(9)  |
| O(7) <sup>#1</sup> -Eu(1)-O(10) <sup>#4</sup> | 163.24(10) | O(10) <sup>#4</sup> -Eu(1)-O(1)               | 81.24(10)  |
| O(3) <sup>#2</sup> -Eu(1)-O(10) <sup>#4</sup> | 85.50(10)  | O(8)-Eu(1)-O(9) <sup>#4</sup>                 | 78.29(9)   |
| O(2) <sup>#3</sup> -Eu(1)-O(10) <sup>#4</sup> | 114.93(9)  | O(7) <sup>#1</sup> -Eu(1)-O(9) <sup>#4</sup>  | 143.24(10) |
| O(8)-Eu(1)-O(1)                               | 157.56(10) | O(3) <sup>#2</sup> -Eu(1)-O(9) <sup>#4</sup>  | 127.00(11) |
| O(7) <sup>#1</sup> -Eu(1)-O(1)                | 84.63(9)   | O(2) <sup>#3</sup> -Eu(1)-O(9) <sup>#4</sup>  | 73.81(10)  |
| O(3) <sup>#2</sup> -Eu(1)-O(1)                | 74.99(10)  | O(10) <sup>#4</sup> -Eu(1)-O(9) <sup>#4</sup> | 53.36(9)   |
| O(2) <sup>#3</sup> -Eu(1)-O(1)                | 100.11(9)  | O(1)-Eu(1)-O(9) <sup>#4</sup>                 | 121.30(9)  |

## 8

|                                              |            |                                              |            |
|----------------------------------------------|------------|----------------------------------------------|------------|
| Tb(1)-O(3) <sup>#1</sup>                     | 2.278(4)   | Tb(1)-O(7)                                   | 2.399(4)   |
| Tb(1)-O(4) <sup>#2</sup>                     | 2.280(4)   | Tb(1)-O(1)                                   | 2.413(4)   |
| Tb(1)-O(9) <sup>#3</sup>                     | 2.286(4)   | Tb(1)-O(2)                                   | 2.432(4)   |
| Tb(1)-O(8) <sup>#4</sup>                     | 2.328(4)   |                                              |            |
| O(3) <sup>#1</sup> -Tb(1)-O(4) <sup>#2</sup> | 84.20(14)  | O(9) <sup>#3</sup> -Tb(1)-O(1) <sup>#5</sup> | 85.27(14)  |
| O(3) <sup>#1</sup> -Tb(1)-O(9) <sup>#3</sup> | 85.49(15)  | O(8) <sup>#4</sup> -Tb(1)-O(1) <sup>#5</sup> | 115.04(14) |
| O(4) <sup>#2</sup> -Tb(1)-O(9) <sup>#3</sup> | 82.16(16)  | O(7)-Tb(1)-O(1) <sup>#5</sup>                | 79.95(14)  |
| O(3) <sup>#1</sup> -Tb(1)-O(8) <sup>#4</sup> | 95.91(15)  | O(1)-Tb(1)-O(1) <sup>#5</sup>                | 0.00(17)   |
| O(4) <sup>#2</sup> -Tb(1)-O(8) <sup>#4</sup> | 76.12(15)  | O(3) <sup>#1</sup> -Tb(1)-O(2)               | 77.92(14)  |
| O(9) <sup>#3</sup> -Tb(1)-O(8) <sup>#4</sup> | 157.95(15) | O(4) <sup>#2</sup> -Tb(1)-O(2)               | 143.37(15) |
| O(3) <sup>#1</sup> -Tb(1)-O(7)               | 159.88(15) | O(9) <sup>#3</sup> -Tb(1)-O(2)               | 127.23(16) |
| O(4) <sup>#2</sup> -Tb(1)-O(7)               | 85.30(14)  | O(8) <sup>#4</sup> -Tb(1)-O(2)               | 74.27(15)  |
| O(9) <sup>#3</sup> -Tb(1)-O(7)               | 76.09(15)  | O(7)-Tb(1)-O(2)                              | 119.80(14) |
| O(8) <sup>#4</sup> -Tb(1)-O(7)               | 98.18(15)  | O(1)-Tb(1)-O(2)                              | 53.84(13)  |
| O(3) <sup>#1</sup> -Tb(1)-O(1)               | 106.87(14) | O(1) <sup>#5</sup> -Tb(1)-O(2)               | 53.84(13)  |
| O(4) <sup>#2</sup> -Tb(1)-O(1)               | 162.55(15) | O(7)-Tb(1)-O(1)                              | 79.95(14)  |
| O(9) <sup>#3</sup> -Tb(1)-O(1)               | 85.27(14)  | O(3) <sup>#1</sup> -Tb(1)-O(1) <sup>#5</sup> | 106.87(14) |
| O(8) <sup>#4</sup> -Tb(1)-O(1)               | 115.04(14) | O(4) <sup>#2</sup> -Tb(1)-O(1) <sup>#5</sup> | 162.55(15) |

## 9

|                               |           |                                               |           |
|-------------------------------|-----------|-----------------------------------------------|-----------|
| Ho(1)-O(8)                    | 2.248(3)  | Ho(1)-O(2)                                    | 2.291(3)  |
| Ho(1)-O(7) <sup>#1</sup>      | 2.256(3)  | Ho(1)-O(1) <sup>#2</sup>                      | 2.365(3)  |
| Ho(1)-O(3) <sup>#1</sup>      | 2.265(3)  | Ho(1)-O(10) <sup>#3</sup>                     | 2.378(3)  |
| Ho(1)-O(9) <sup>#3</sup>      | 2.419(3)  |                                               |           |
| O(8)-Ho(1)-O(7) <sup>#1</sup> | 85.10(11) | O(1) <sup>#2</sup> -Ho(1)-O(10) <sup>#3</sup> | 78.85(11) |

|                                              |            |                                               |            |
|----------------------------------------------|------------|-----------------------------------------------|------------|
| O(8)-Ho(1)-O(3) <sup>#1</sup>                | 86.02(12)  | O(8)-Ho(1)-O(9) <sup>#3</sup>                 | 77.76(11)  |
| O(7) <sup>#1</sup> -Ho(1)-O(3) <sup>#1</sup> | 81.59(13)  | O(7)#1-Ho(1)-O(9) <sup>#3</sup>               | 143.75(12) |
| O(8)-Ho(1)-O(2)                              | 96.94(12)  | O(3) <sup>#1</sup> -Ho(1)-O(9) <sup>#3</sup>  | 127.96(13) |
| O(7) <sup>#1</sup> -Ho(1)-O(2)               | 76.16(12)  | O(2)-Ho(1)-O(9) <sup>#3</sup>                 | 74.55(12)  |
| O(3) <sup>#1</sup> -Ho(1)-O(2)               | 157.18(12) | O(1) <sup>#2</sup> -Ho(1)-O(9) <sup>#3</sup>  | 117.74(11) |
| O(8)-Ho(1)-O(1) <sup>#2</sup>                | 162.45(12) | O(10) <sup>#3</sup> -Ho(1)-O(9) <sup>#3</sup> | 54.48(11)  |
| O(7) <sup>#1</sup> -Ho(1)-O(1) <sup>#2</sup> | 85.75(11)  | O(8)-Ho(1)-O(10) <sup>#3</sup>                | 106.84(12) |
| O(3) <sup>#1</sup> -Ho(1)-O(1) <sup>#2</sup> | 77.84(12)  | O(7) <sup>#1</sup> -Ho(1)-O(10)#3             | 161.45(12) |
| O(2)-Ho(1)-O(1) <sup>#2</sup>                | 95.37(11)  | O(3) <sup>#1</sup> -Ho(1)-O(10) <sup>#3</sup> | 85.08(12)  |
| O(2)-Ho(1)-O(10) <sup>#3</sup>               | 115.28(11) |                                               |            |

### 10

|                                               |          |                                               |            |
|-----------------------------------------------|----------|-----------------------------------------------|------------|
| Yb(1)-O(4) <sup>#1</sup>                      | 2.213(5) | Yb(1)-O(10) <sup>#4</sup>                     | 2.329(5)   |
| Yb(1)-O(3) <sup>#2</sup>                      | 2.224(5) | Yb(1)-O(1)                                    | 2.349(6)   |
| Yb(1)-O(8)                                    | 2.228(6) | Yb(1)-O(2)                                    | 2.392(5)   |
| Yb(1)-O(9) <sup>#3</sup>                      | 2.241(6) |                                               |            |
| O(4) <sup>#1</sup> -Yb(1)-O(3) <sup>#2</sup>  | 85.3(2)  | O(10) <sup>#4</sup> -Yb(1)-O(2)               | 115.21(19) |
| O(4) <sup>#1</sup> -Yb(1)-O(8)                | 81.7(2)  | O(1)-Yb(1)-O(2)                               | 54.86(19)  |
| O(3) <sup>#2</sup> -Yb(1)-O(8)                | 87.3(2)  | O(3) <sup>#2</sup> -Yb(1)-O(10) <sup>#4</sup> | 165.7(2)   |
| O(4) <sup>#1</sup> -Yb(1)-O(9) <sup>#3</sup>  | 76.6(2)  | O(8)-Yb(1)-O(10) <sup>#4</sup>                | 79.9(2)    |
| O(3) <sup>#2</sup> -Yb(1)-O(9) <sup>#3</sup>  | 97.3(2)  | O(9) <sup>#3</sup> -Yb(1)-O(10) <sup>#4</sup> | 92.1(2)    |
| O(8)-Yb(1)-O(9) <sup>#3</sup>                 | 157.3(2) | O(4) <sup>#1</sup> -Yb(1)-O(1)                | 160.3(2)   |
| O(4) <sup>#1</sup> -Yb(1)-O(10) <sup>#4</sup> | 86.4(2)  | O(3) <sup>#2</sup> -Yb(1)-O(1)                | 108.0(2)   |
| O(10) <sup>#4</sup> -Yb(1)-O(1)               | 77.4(2)  | O(8)-Yb(1)-O(1)                               | 84.4(2)    |
| O(4) <sup>#1</sup> -Yb(1)-O(2)                | 144.4(2) | O(9) <sup>#3</sup> -Yb(1)-O(1)                | 114.7(2)   |
| O(3) <sup>#2</sup> -Yb(1)-O(2)                | 77.9(2)  | O(8)-Yb(1)-O(2)                               | 127.9(2)   |
| O(9) <sup>#3</sup> -Yb(1)-O(2)                | 74.7(2)  |                                               |            |

Symmetry transformations used to generate equivalent atoms:

For **1**: (#1)  $x-1, y+1, z$ ; (#2)  $-x, -y+2, -z+1$ ; (#3)  $-x+1, -y+1, -z$ ; (#4)  $x+1, y-1, z$ ; (#5)  $-x+1, -y+1, -z+1$ . For **2**: (#1)  $x+1, y-1, z$ ; (#2)  $-x+1, -y, -z+1$ ; (#3)  $-x, -y+1, -z+2$ ; (#4)  $x-1, y+1, z$ ; (#5)  $-x, -y+1, -z+1$ . For **3**: (#1)  $-x+2, -y+2, -z+1$ ; (#2)  $x-1, y-1, z$ ; (#3)  $-x+2, -y+3, -z+1$ . For **4**: (#1)  $-x+1, -y+2, -z+1$ ; (#2)  $-x+1, -y+1, -z+1$ ; (#3)  $x+1, y-1, z$ . For **5**: (#1)  $-x+2, -y+1, -z+1$ ; (#2)  $x-1, y-1, z$ ; (#3)  $-x+2, -y, -z+1$ . For **6**: (#1)  $-x+2, -y+1, -z+1$ ; (#2)  $x+1, y, z$ ; (#3)  $-x+1, -y+1, -z+1$ ; (#4)  $x-1, y+1, z$ . For **7**: (#1)  $-x+2, -y+1, -z+1$ ; (#2)  $x+1, y, z$ ; (#3)  $-x+1, -y+1, -z+1$ ; (#4)  $-x+1, -y+2, -z+1$ . For **8**: (#1)  $-x+1, -y+2, -z+1$ ; (#2)  $x+1, y-1, z$ ; (#3)  $x+1, y, z$ ; (#4)  $-x+1, -y+1, -z+1$ ; (#5)  $x, y, z$ . For **9**: (#1)  $-x+2, -y+1, -z+1$ ; (#2)  $-x+1, -y+1, -z+1$ ; (#3)  $-x+1, -y+2, -z+1$ ; For **10**: (#1)  $x+1, y-1, z$ ; (#2)  $-x+1, -y+2, -z+1$ ; (#3)  $-x+2, -y+1, -z+1$ ; (#4)  $x-1, y, z$ .



**Table S2.** Hydrogen bonds for **1-10** [Å and °]

| D-H...A                            | d(D-H) | d(H...A) | d(D...A)  | <(DHA) |
|------------------------------------|--------|----------|-----------|--------|
| <b>1</b>                           |        |          |           |        |
| C(2)-H(2A)...O(27) <sup>#1</sup>   | 0.93   | 2.54     | 3.452(7)  | 165.5  |
| C(53)-H(53A)...O(33) <sup>#2</sup> | 0.93   | 2.57     | 3.474(7)  | 163.0  |
| C(57)-H(57A)...O(17) <sup>#3</sup> | 0.93   | 2.29     | 3.042(8)  | 137.5  |
| C(56)-H(56A)...O(35) <sup>#4</sup> | 0.93   | 2.33     | 3.218(8)  | 159.6  |
| C(49)-H(49A)...O(15) <sup>#5</sup> | 0.93   | 2.66     | 3.566(8)  | 163.8  |
| C(49)-H(49A)...O(16) <sup>#6</sup> | 0.93   | 2.58     | 3.391(8)  | 146.1  |
| <b>2</b>                           |        |          |           |        |
| C(54)-H(54A)...O(11) <sup>#1</sup> | 0.93   | 2.33     | 3.044(8)  | 133.2  |
| C(26)-H(26A)...O(15) <sup>#1</sup> | 0.93   | 2.51     | 3.412(7)  | 165.0  |
| C(52)-H(52A)...O(1) <sup>#2</sup>  | 0.93   | 2.72     | 3.540(8)  | 148.2  |
| C(42)-H(42A)...O(39) <sup>#3</sup> | 0.93   | 2.66     | 3.565(7)  | 165.2  |
| C(53)-H(53A)...O(9) <sup>#4</sup>  | 0.93   | 2.63     | 3.536(8)  | 163.9  |
| C(10)-H(10A)...O(18) <sup>#5</sup> | 0.93   | 2.59     | 2.977(7)  | 105.6  |
| C(49)-H(49A)...O(32) <sup>#6</sup> | 0.93   | 2.59     | 3.489(8)  | 163.6  |
| C(58)-H(58A)...O(36) <sup>#7</sup> | 0.93   | 2.32     | 3.197(9)  | 157.8  |
| <b>3</b>                           |        |          |           |        |
| N(3)-H(3A)...O(3) <sup>#1</sup>    | 0.86   | 1.68     | 2.439(11) | 146.4  |
| C(12)-H(12)...O(2) <sup>#2</sup>   | 0.93   | 2.54     | 3.458(6)  | 170.2  |
| <b>4</b>                           |        |          |           |        |
| C(12)-H(12A)...O(13) <sup>#1</sup> | 0.93   | 2.72     | 3.649(4)  | 178.0  |
| N(3)-H(3A)...O(3) <sup>#2</sup>    | 0.86   | 1.76     | 2.531(6)  | 147.9  |
| C(20)-H(20A)...O(16) <sup>#3</sup> | 0.93   | 2.39     | 3.291(7)  | 164.1  |
| C(21)-H(21A)...O(15) <sup>#4</sup> | 0.93   | 2.50     | 3.046(7)  | 117.8  |
| <b>5</b>                           |        |          |           |        |
| C(18)-H(18A)...O(15) <sup>#1</sup> | 0.93   | 2.60     | 3.50(2)   | 164.2  |
| C(4)-H(4A)...O(8) <sup>#2</sup>    | 0.93   | 2.59     | 3.501(6)  | 167.7  |
| C(21)-H(21A)...O(16) <sup>#3</sup> | 0.93   | 2.41     | 2.96(3)   | 117.5  |
| C(20)-H(20A)...O(15) <sup>#3</sup> | 0.93   | 2.16     | 3.07(2)   | 167.2  |
| N(3)-H(3A)...O(9) <sup>#4</sup>    | 0.86   | 1.73     | 2.493(13) | 146.8  |
| <b>6</b>                           |        |          |           |        |
| N(3)-H(3A)...O(10) <sup>#1</sup>   | 0.86   | 1.70     | 2.540(7)  | 166.5  |
| C(17)-H(17A)...O(12) <sup>#2</sup> | 0.93   | 2.70     | 3.609(9)  | 164.4  |
| C(18)-H(18A)...O(5) <sup>#2</sup>  | 0.93   | 2.32     | 3.061(9)  | 136.6  |
| C(20)-H(20A)...O(11) <sup>#3</sup> | 0.93   | 2.62     | 3.154(9)  | 116.9  |
| C(21)-H(21A)...O(3) <sup>#4</sup>  | 0.93   | 2.29     | 3.082(7)  | 143.1  |
| C(2)-H(2A)...O(4) <sup>#5</sup>    | 0.93   | 2.55     | 3.432(7)  | 159.1  |
| <b>7</b>                           |        |          |           |        |
| N(3)-H(3A)...O(4) <sup>#1</sup>    | 0.86   | 1.69     | 2.537(4)  | 166.7  |
| C(17)-H(17A)...O(6) <sup>#2</sup>  | 0.93   | 2.70     | 3.611(6)  | 165.0  |

|                                     |      |      |          |       |
|-------------------------------------|------|------|----------|-------|
| C(18)-H(18A) ...O(11) <sup>#3</sup> | 0.93 | 2.31 | 3.058(6) | 136.8 |
| C(21)-H(21A) ...O(10) <sup>#4</sup> | 0.93 | 2.29 | 3.094(5) | 144.4 |
| C(20)-H(20A) ...O(5) <sup>#5</sup>  | 0.93 | 2.64 | 3.176(6) | 117.1 |
| C(14)-H(14A) ...O(1) <sup>#6</sup>  | 0.93 | 2.66 | 3.549(4) | 160.9 |
| C(6)-H(6A) ...O(12) <sup>#6</sup>   | 0.93 | 2.39 | 3.200(5) | 145.6 |

### 8

|                                     |      |      |          |       |
|-------------------------------------|------|------|----------|-------|
| N(3)-H(3A) ...O(10) <sup>#1</sup>   | 0.86 | 1.70 | 2.544(6) | 166.8 |
| C(17)-H(17A) ...O(1) <sup>#2</sup>  | 0.93 | 2.29 | 3.095(7) | 144.6 |
| C(18)-H(18A) ...O(11) <sup>#3</sup> | 0.93 | 2.70 | 3.204(9) | 114.9 |
| C(21)-H(21A) ...O(12) <sup>#4</sup> | 0.93 | 2.69 | 3.597(9) | 164.3 |
| C(14)-H(14A) ...O(5) <sup>#5</sup>  | 0.93 | 2.38 | 3.199(8) | 146.6 |
| C(4)-H(4A) ...O(7) <sup>#6</sup>    | 0.93 | 2.68 | 3.579(6) | 162.1 |
| C(2)-H(2A) ...O(2) <sup>#7</sup>    | 0.93 | 2.51 | 3.385(6) | 157.7 |

### 9

|                                     |      |      |          |       |
|-------------------------------------|------|------|----------|-------|
| N(3)-H(3A) ...O(4) <sup>#1</sup>    | 0.86 | 1.68 | 2.527(5) | 167.4 |
| C(18)-H(18A) ...O(5) <sup>#2</sup>  | 0.93 | 2.72 | 3.221(7) | 114.9 |
| C(21)-H(21A) ...O(6) <sup>#3</sup>  | 0.93 | 2.69 | 3.591(7) | 164.2 |
| C(17)-H(17A) ...O(10) <sup>#2</sup> | 0.93 | 2.29 | 3.097(6) | 145.3 |
| C(20)-H(20A) ...O(11) <sup>#4</sup> | 0.93 | 2.31 | 3.051(7) | 136.8 |
| C(14)-H(14A) ...O(1) <sup>#5</sup>  | 0.93 | 2.71 | 3.613(5) | 163.5 |
| C(6)-H(6A) ...O(12) <sup>#6</sup>   | 0.93 | 2.40 | 3.214(6) | 146.0 |

### 10

|                                     |      |      |           |       |
|-------------------------------------|------|------|-----------|-------|
| C(12)-H(12A) ...O(6) <sup>#1</sup>  | 0.93 | 2.34 | 3.068(12) | 134.7 |
| C(13)-H(13A) ...O(11) <sup>#2</sup> | 0.93 | 2.67 | 3.574(13) | 164.4 |
| C(9)-H(9A) ...O(1)                  | 0.93 | 2.30 | 3.105(11) | 145.0 |
| N(3)-H(3A) ...O(7)                  | 0.86 | 1.71 | 2.553(9)  | 167.1 |

Symmetry transformations used to generate equivalent atoms:

For **1**: (#1)  $x-1, y+1, z$ ; (#2)  $-x+1, -y+1, -z$ ; (#3)  $-x+1, -y, -z+1$ ; (#4)  $-x+2, -y, -z$ ; (#5)  $-x, -y+1, -z+1$ . For **2**: (#1)  $x+1, y-1, z$ ; (#2)  $-x+1, -y, -z+1$ ; (#3)  $-x, -y+1, -z+2$ ; (#4)  $x, y, z$ ; (#5)  $-x+1, -y+1, -z+1$ ; (#6)  $-x+2, -y, -z+1$ . For **3**: (#1)  $x-1, y-1, z+1$ ; (#2)  $-x+2, -y+3, -z+1$ . For **4**: (#1)  $-x+1, -y+2, -z+1$ ; (#2)  $x, y, z-1$ ; (#3)  $-x+1, -y+2, -z$ ; (#4)  $-x+2, -y+1, -z$ . For **5**: (#1)  $x, y, z$ ; (#2)  $-x+2, -y+1, -z+1$ ; (#3)  $-x+1, -y+1, -z+2$ ; (#4)  $x-1, y, z+1$ . For **6**: (#1)  $x+1, y, z$ ; (#2)  $-x+1, -y, -z+2$ ; (#3)  $x, y+1, z$ ; (#4)  $x-1, y+1, z$ ; (#5)  $-x+3, -y, -z+1$ . For **7**: (#1)  $-x, -y+1, -z+1$ ; (#2)  $x, y+1, z-1$ ; (#3)  $-x+2, -y+2, -z$ ; (#4)  $x, y-1, z$ ; (#5)  $-x+1, -y, -z+1$ ; (#6)  $-x+2, -y+1, -z+1$ . For **8**: (#1)  $x+1, y, z$ ; (#2)  $x, y, z$ ; (#3)  $x, y+1, z$ ; (#4)  $-x+1, -y, -z+2$ ; (#5)  $x+1, y-1, z$ ; (#6)  $x-1, y+1, z$ ; (#7)  $-x+1, -y+2, -z+1$ . For **9**: (#1)  $-x+2, -y+1, -z+1$ ; (#2)  $-x+1, -y+2, -z+1$ ; (#3)  $x, y-1, z+1$ ; (#4)  $x-1, y-1, z+1$ ; (#5)  $x+1, y, z$ ; (#6)  $x-1, y, z$ . For **10**: (#1)  $-x, -y+1, -z+2$ ; (#2)  $-x+2, -y, -z+2$ .
